# Supplementary material for: Structure modulated charge transfer in carbon atomic wires
Source: PubMed Central journal article supplement (PMC6367501; doi:10.1038/s41598-018-38367-9), 2019-02-07
Supplement: 41598_2018_38367_MOESM1_ESM.pdf [file 41598_2018_38367_MOESM1_ESM.pdf]

## Supplementary Information

# Structure modulated charge transfer in carbon atomic wires

A. Milani<sup>a</sup>, V. Barbieri<sup>a</sup>, A. Facibeni<sup>a</sup>, V. Russo<sup>a</sup>, A. Li Bassi<sup>a</sup>, A. Lucotti<sup>b</sup>, M. Tommasini<sup>b</sup>, M. D. Tzirakis<sup>c</sup>, F. Diederich<sup>c</sup>, C. S. Casari<sup>a,\*</sup>

<sup>a</sup> Micro and Nanostructured Materials Laboratory – NanoLab, Department of Energy, Politecnico di Milano  
via Ponzio 34/3, I-20133 Milano, Italy

<sup>b</sup> Department of Chemistry, Materials and Chem. Eng. 'G. Natta', Politecnico di Milano Piazza Leonardo da Vinci 32, I-20133 Milano, Italy

<sup>c</sup> Laboratory of Organic Chemistry, Department of Chemistry and Applied Biosciences, ETH Zurich, Vladimir-Prelog-Weg 3, 8093 Zurich, Switzerland

\*Corresponding author: Carlo S. Casari email: [carlo.casari@polimi.it](mailto:carlo.casari@polimi.it)

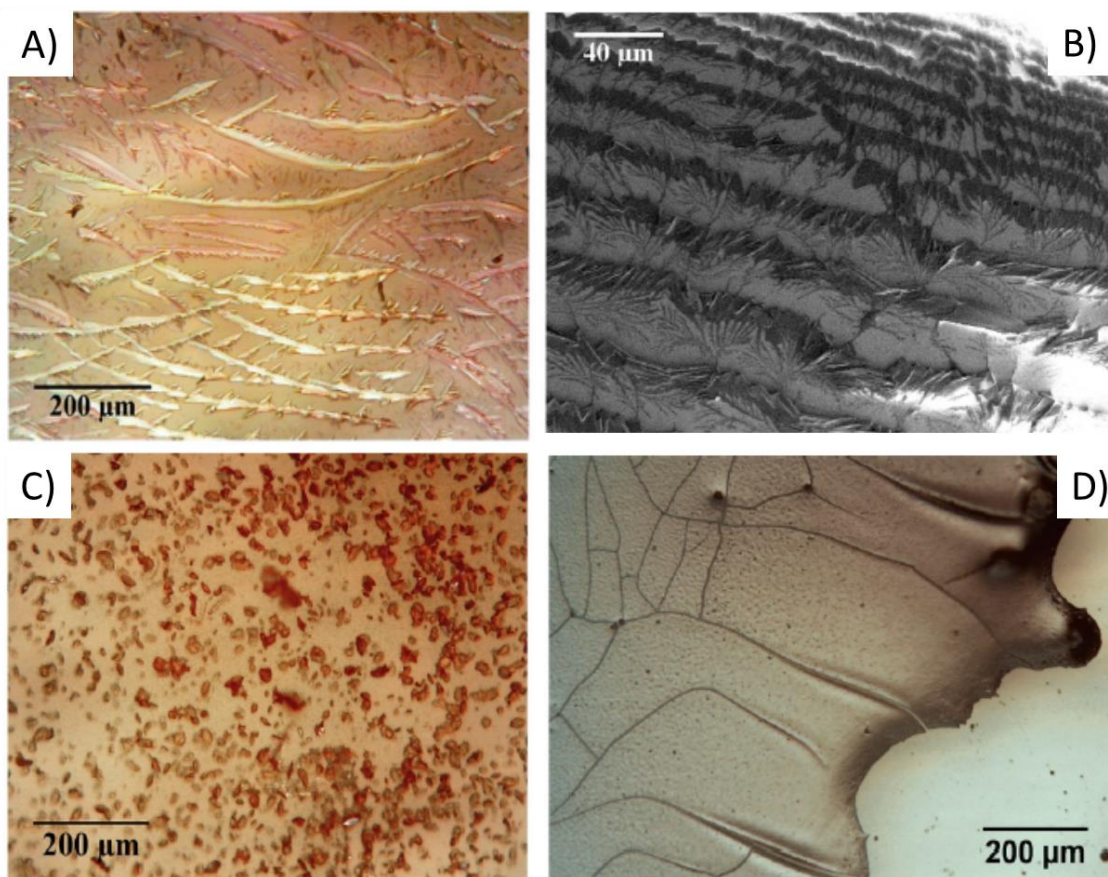

Figure S1: A, B) optical microscopy and SEM image of C2 deposits; C) optical microscopy image of C8; and D) optical microscopy image of C6/TCBD.

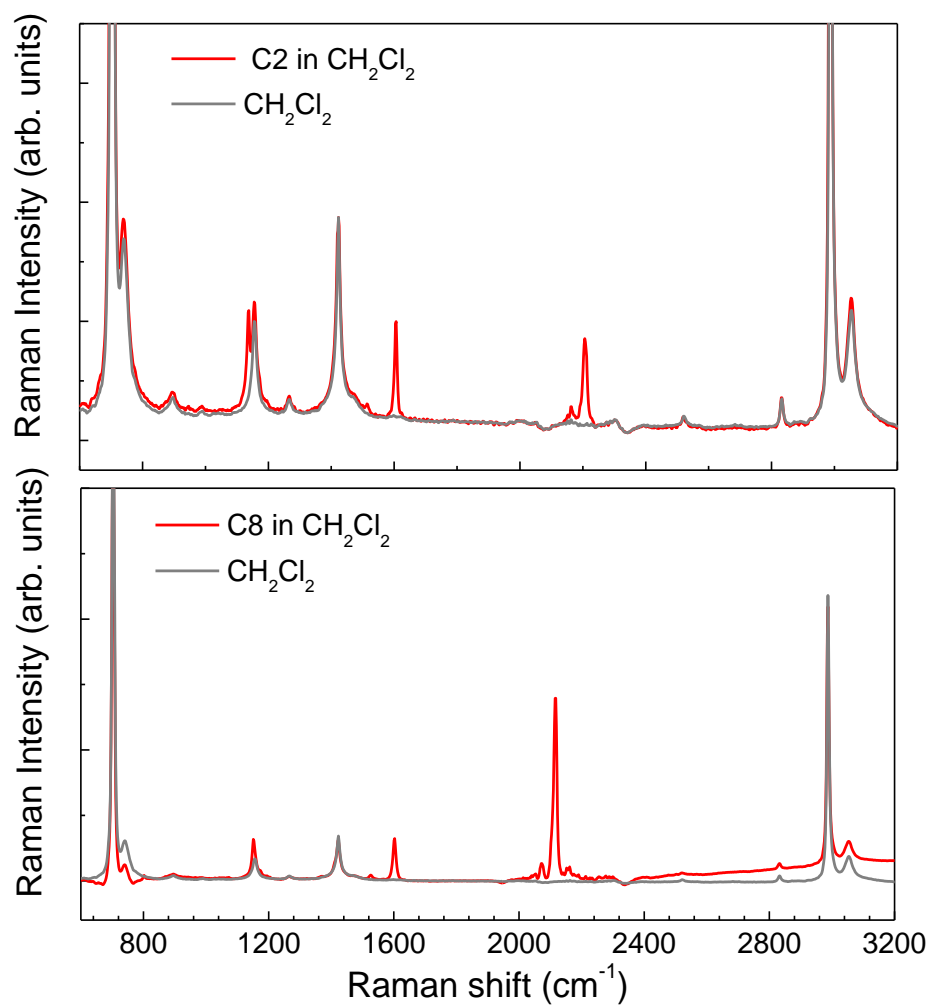

Figure S2: FT-Raman spectra (1064 nm) of C2 and C8 in solution (CH<sub>2</sub>Cl<sub>2</sub>). The solvent contribution is depicted in grey for comparison.

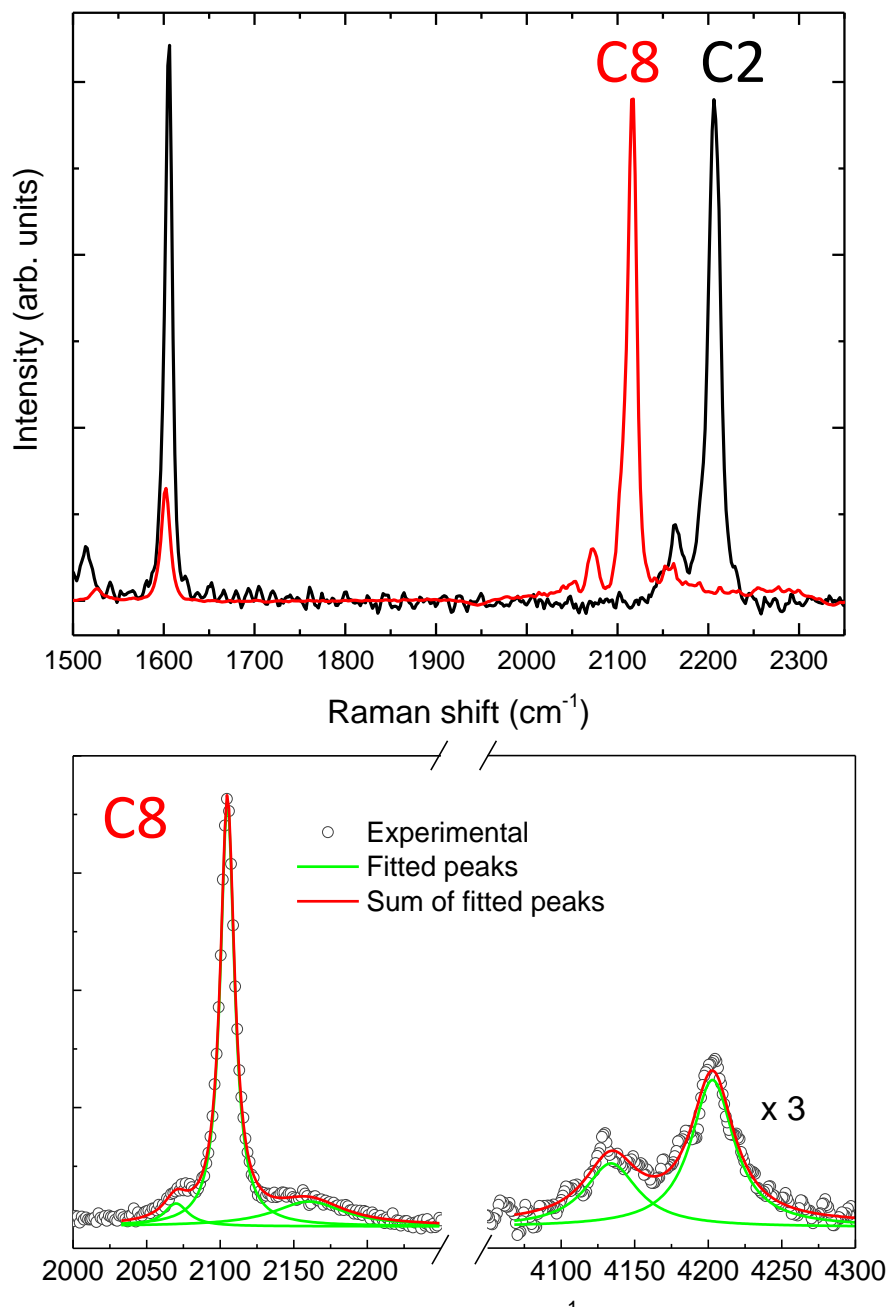

Figure S3: (Top) comparison of FT-Raman spectra of C2 and C8 in solution ( $\text{CH}_2\text{Cl}_2$ ; 1064 nm). The contribution of the solvent has been subtracted. (Bottom) fit of ECC mode and second order Raman region for C8.

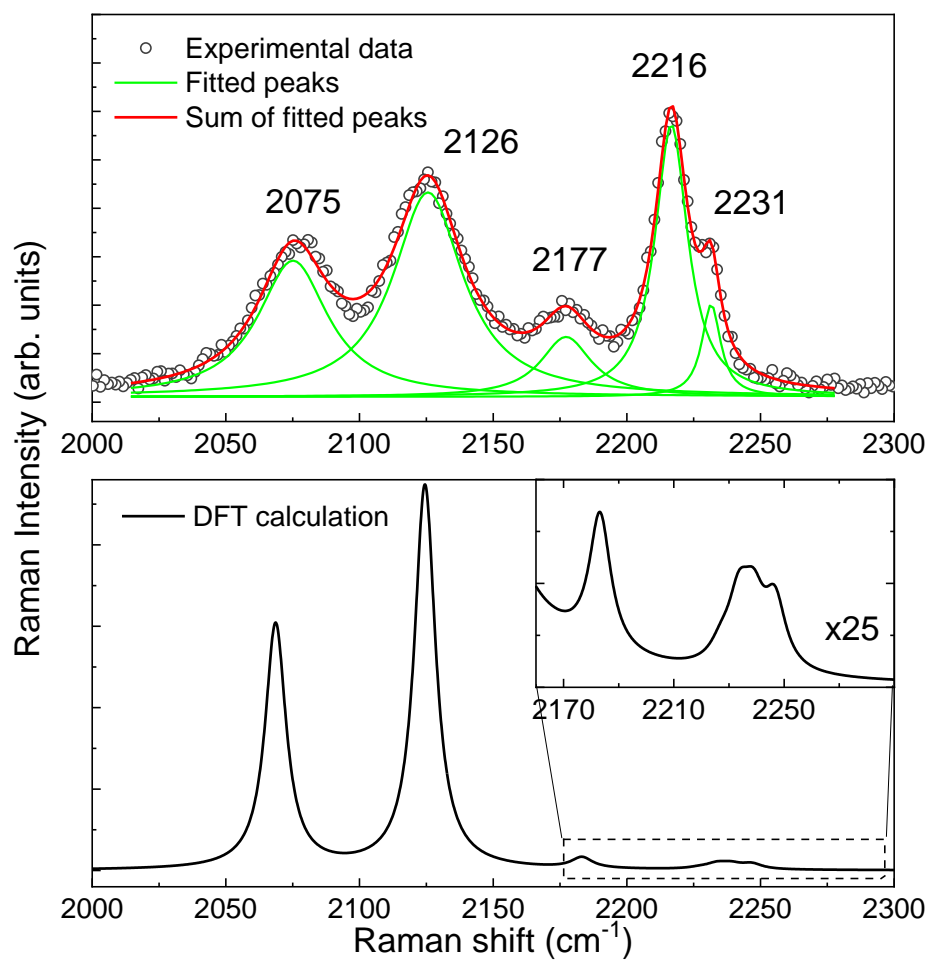

Figure S4: (Top) sp-carbon region detail of the experimental FT-Raman spectrum of C6/TCBD (1064 nm, in film) and fit of the contribution. (Bottom) DFT calculation of the same region.

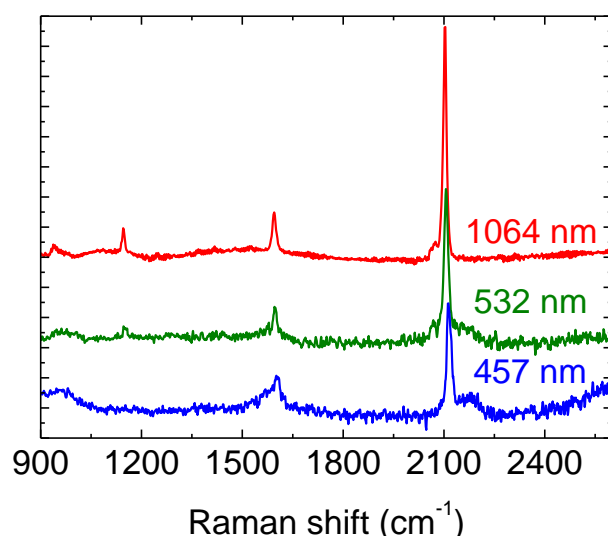

Figure S5: Raman spectra at different wavelengths of C8 deposited in film.

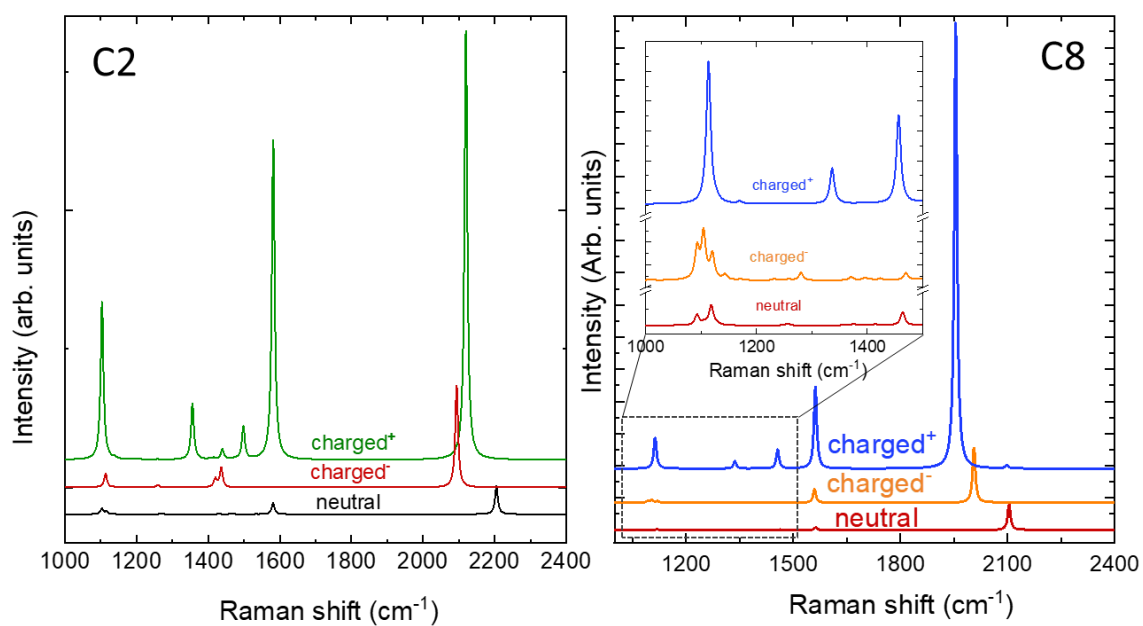

Figure S6: Comparison of DFT computed Raman spectra of neutral, positively and negatively charged C2 (left) and C8 (right) molecule. Details of the region at low frequency (1000-1500  $\text{cm}^{-1}$ ) is reported in the inset.

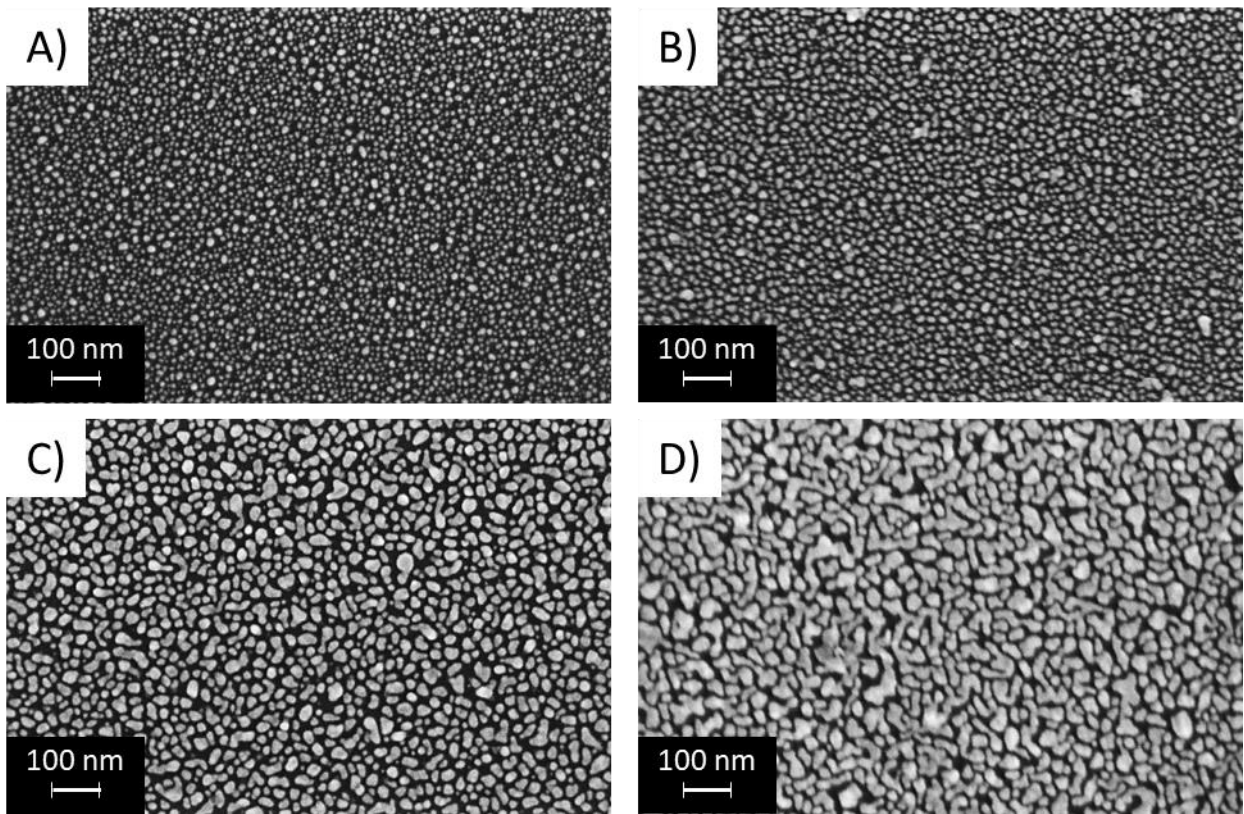

Figure S7: Morphological SEM images of solid SERS-active substrates obtained by vacuum deposition of silver nanoislands.

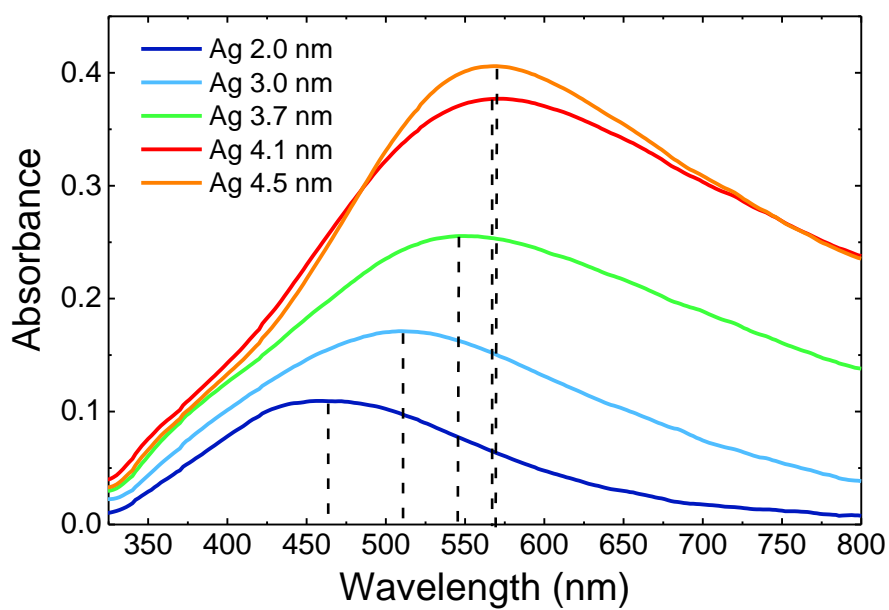

Figure S8: UV-vis absorption spectra of Ag SERS active substrates on glass.

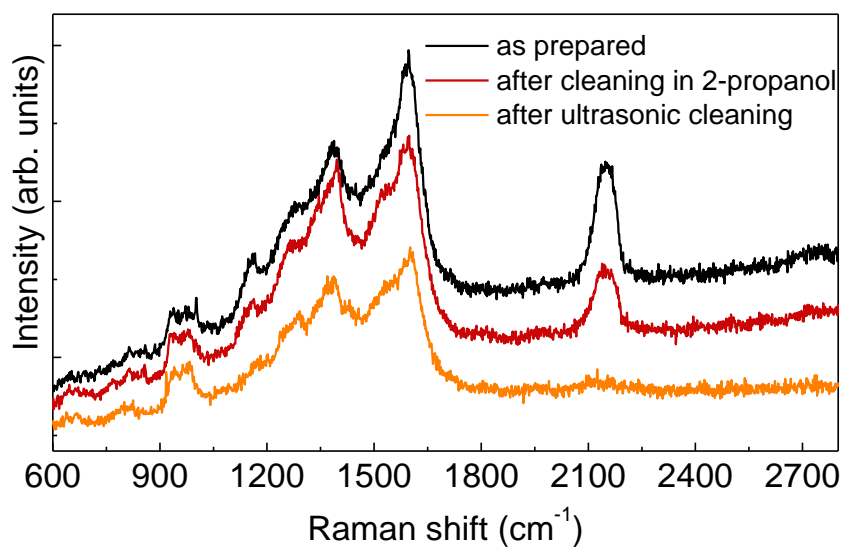

Figure S9: Raman spectra of bare SERS-active substrates (3.0 nm Ag equivalent thickness) as prepared and after different cleaning procedures.



Table S1: DFT computed values of  $E_{\text{ion}}$  in eV computed for the investigated systems in the two configurations  $\text{Ag}^+/\text{CAW}^-$ ,  $\text{Ag}^-/\text{CAW}^+$ ;  $\Delta E_{\text{ion}} = E_{\text{ion}}(\text{Ag}^+/\text{CAW}^-) - E_{\text{ion}}(\text{Ag}^-/\text{CAW}^+)$  is also reported. The values of the BLA (bond length alternation) are reported for neutral and charged systems.

| Molecule | $\text{Ag}^+/\text{CAW}^-$ [eV] | $\text{Ag}^-/\text{CAW}^+$ [eV] | $\Delta E_{\text{ion}}$ [eV] | BLA-neutral [ $\text{\AA}$ ] | BLA-charged [ $\text{\AA}$ ] |
|----------|---------------------------------|---------------------------------|------------------------------|------------------------------|------------------------------|
| C2       | 4.329                           | 4.028                           | +0.301                       | -                            | -                            |
| C4       | 3.898                           | 4.031                           | -0.133                       | 0.1424                       | 0.0973                       |
| C6       | 3.522                           | 4.040                           | -0.518                       | 0.1323                       | 0.0888                       |
| C8       | 3.050                           | 4.051                           | -1.001                       | 0.1257                       | 0.0842                       |
| C6/TCBD  | 1.840                           | 5.559                           | -3.719                       | 0.1167                       | 0.1220                       |
